# Supplementary material for: Systematic Investigation of Plant-Parasitic Nematodes Associated with Main Subtropical Crops in Guangxi Province, China
Source: MDPI journal article supplement (doi:10.3390/life11111177), 2021-11-03
Supplement: s1 [file s1]

Supplementary data of:

# Systematic Investigation of Plant-Parasitic Nematodes Associated with Main Subtropical Crops in Guangxi Province, China

Yi-Xue Mo, Ai-Su Mo, Zhuo-Qiu Qiu, Bing-Xue Li and Hai-Yan Wu \*

Guangxi Key Laboratory of Agric-Environment and Agric-Products Safety, Agricultural College of Guangxi University, Nanning 530004, China; 2017304017@st.gxu.edu.cn (Y.-X.M.); winter500@126.com (A.-S.M.); athos0519@163.com (Z.-Q.Q.); 18437958381@163.com (B.-X.L.)

\* Correspondence: wuhy@gxu.edu.cn

**Table S1.** Proportion of major plant parasitic nematodes in different ecological regions.

| Ecological Regions  | Cities        | Genus of Plant Parasitic Nematode |                     |                        |                        |                         |
|---------------------|---------------|-----------------------------------|---------------------|------------------------|------------------------|-------------------------|
|                     |               | <i>Meloidogyne</i>                | <i>Pratylenchus</i> | <i>Helicotylenchus</i> | <i>Hirschmanniella</i> | <i>Tylenchorhynchus</i> |
| Central eco-region  | Chongzuo      | 5.71                              | 31.43               | 34.29                  | 20.00                  | 45.71                   |
|                     | Laibin        | 13.64                             | 38.64               | 22.73                  | 38.64                  | 47.73                   |
|                     | Nanning       | 17.86                             | 19.64               | 17.86                  | 44.64                  | 26.79                   |
| Eastern eco-region  | Guigang       | 24.00                             | 24.00               | 16.00                  | 32.00                  | 52.00                   |
|                     | Hezhou        | 0.00                              | 26.09               | 17.39                  | 34.78                  | 4.35                    |
|                     | Wuzhou        | 22.58                             | 32.26               | 19.35                  | 32.26                  | 41.94                   |
|                     | Yulin         | 17.39                             | 8.60                | 13.04                  | 13.04                  | 43.48                   |
| Northern eco-region | Hechi         | 12.82                             | 33.33               | 28.21                  | 46.15                  | 33.33                   |
|                     | Guilin        | 6.38                              | 10.64               | 10.64                  | 68.09                  | 36.17                   |
|                     | Liuzhou       | 5.88                              | 32.35               | 20.59                  | 50.00                  | 64.71                   |
| Southern eco-region | Beihai        | 14.29                             | 0.00                | 28.57                  | 28.57                  | 85.71                   |
|                     | Fangchenggang | 8.33                              | 41.67               | 33.33                  | 33.33                  | 58.33                   |
|                     | Qinzhou       | 0.00                              | 0.00                | 20.00                  | 16.67                  | 33.33                   |
| Western eco-region  | Baise         | 8.33                              | 29.17               | 45.83                  | 20.83                  | 12.50                   |
